# Supplementary material
Source: MDPI journal article supplement (https://www.mdpi.com/2073-4344/11/6/671)
Supplement: s1 [file s1]

# Supplementary Materials: Design of Iridium N-Heterocyclic Carbene Amino Acid Catalysts for Asymmetric Transfer Hydrogenation of Aryl Ketones

Chad M. Bernier<sup>ID</sup> and Joseph S. Merola\*<sup>ID</sup>

## 1. X-Ray Crystallographic Structure of Ir(Ime)<sub>2</sub>(Gly)(H)(I)

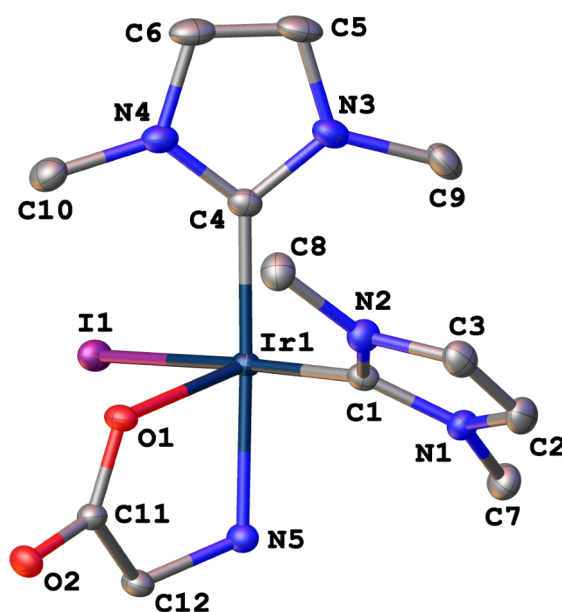

**Figure S1.** Displacement ellipsoid plot (50% probability) of Ir(Ime)<sub>2</sub>(Gly)(H)(I) (CSD 2062242). Hydrogen atoms are omitted for clarity.

**Table S1.** Selected bond lengths and angles from the structure of Ir(Ime)<sub>2</sub>(Gly)(H)(I) obtained by single-crystal X-ray diffraction.

| Atoms     | Bond lengths (Å) |
|-----------|------------------|
| Ir1–C1    | 1.986            |
| Ir1–C4    | 2.004            |
| Ir1–O1    | 2.231            |
| Ir1–N5    | 2.157            |
| Ir1–I1    | 2.738            |
| Atoms     | Bond angles (°)  |
| C1–Ir1–C4 | 89.39            |
| C1–Ir1–O1 | 91.49            |
| C1–Ir1–N5 | 90.53            |
| C4–Ir1–O1 | 101.52           |
| C4–Ir1–I1 | 93.28            |
| O1–Ir1–I1 | 91.60            |
| N5–Ir1–I1 | 86.85            |

## 2. NMR Spectra of Iridium NHC Amino Acid Complexes

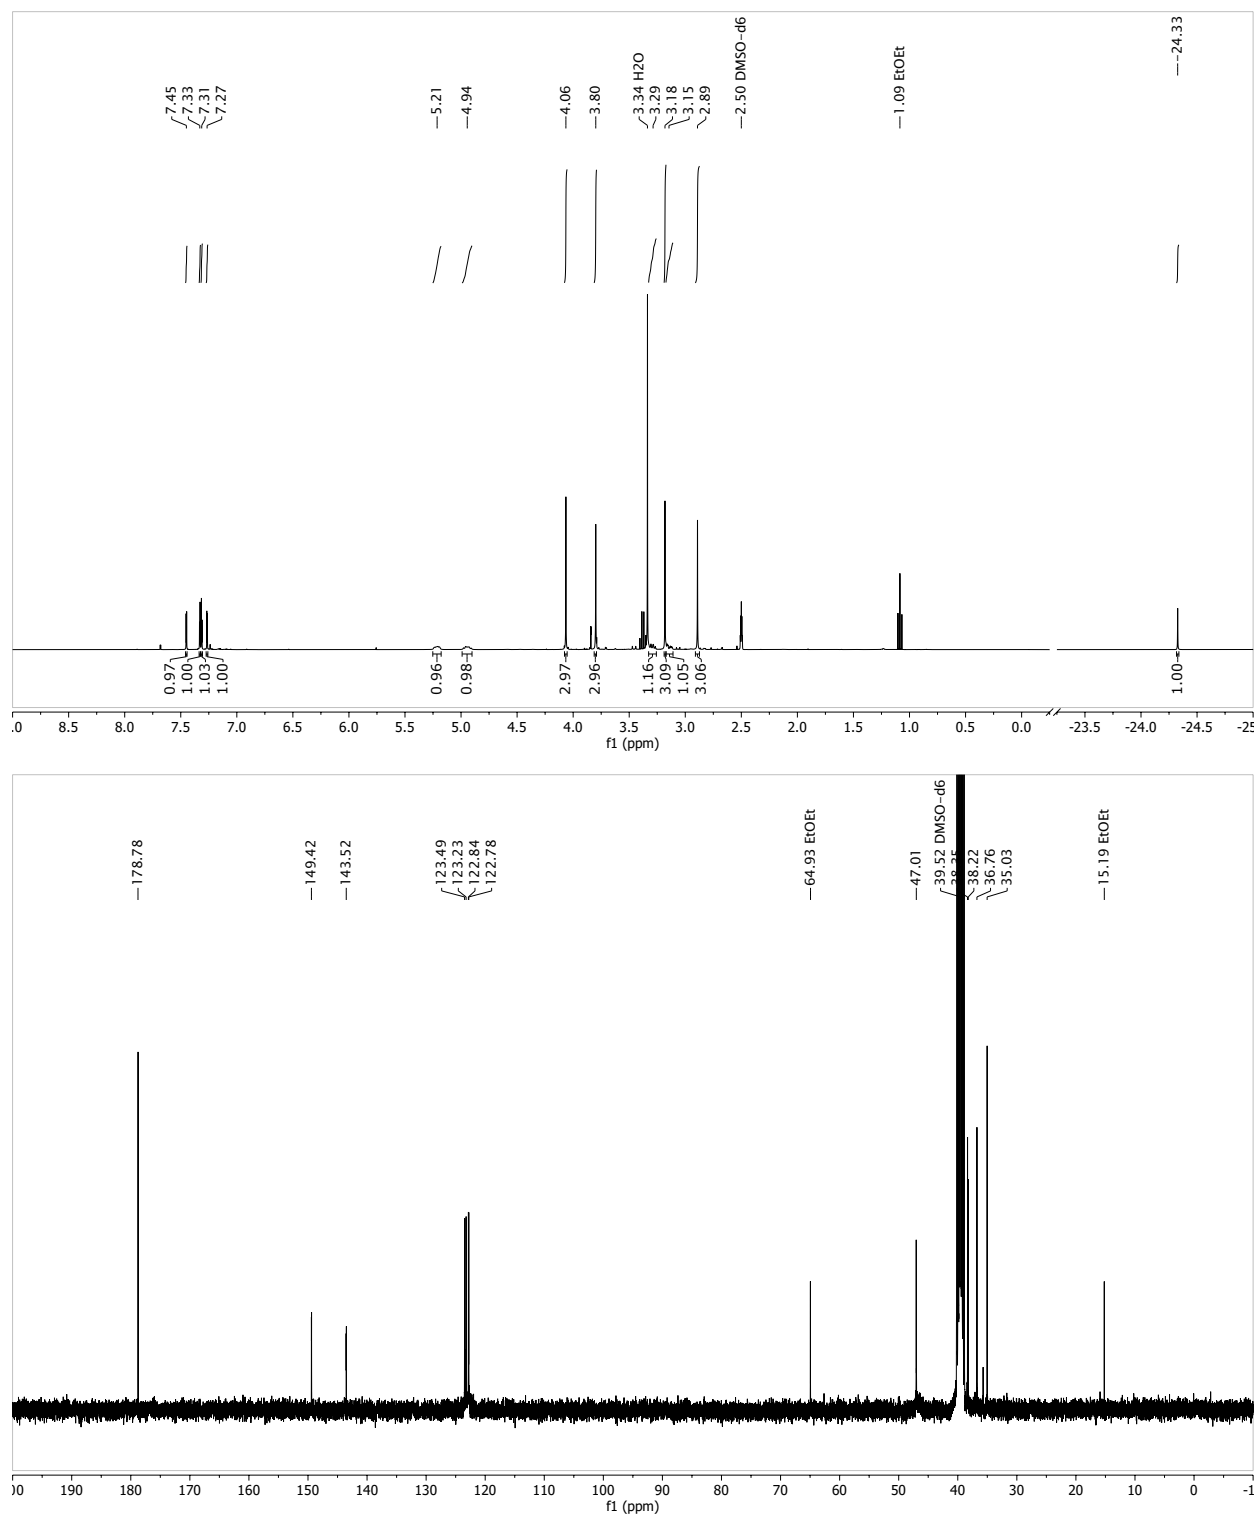

**Figure S2.**  $^1\text{H}$  (top, 400 MHz) and  $^{13}\text{C}$  (bottom, 101 MHz) NMR spectra of  $\text{Ir}(\text{IME})_2(\text{Gly})(\text{H})(\text{I})$  in  $\text{DMSO}-d_6$ .

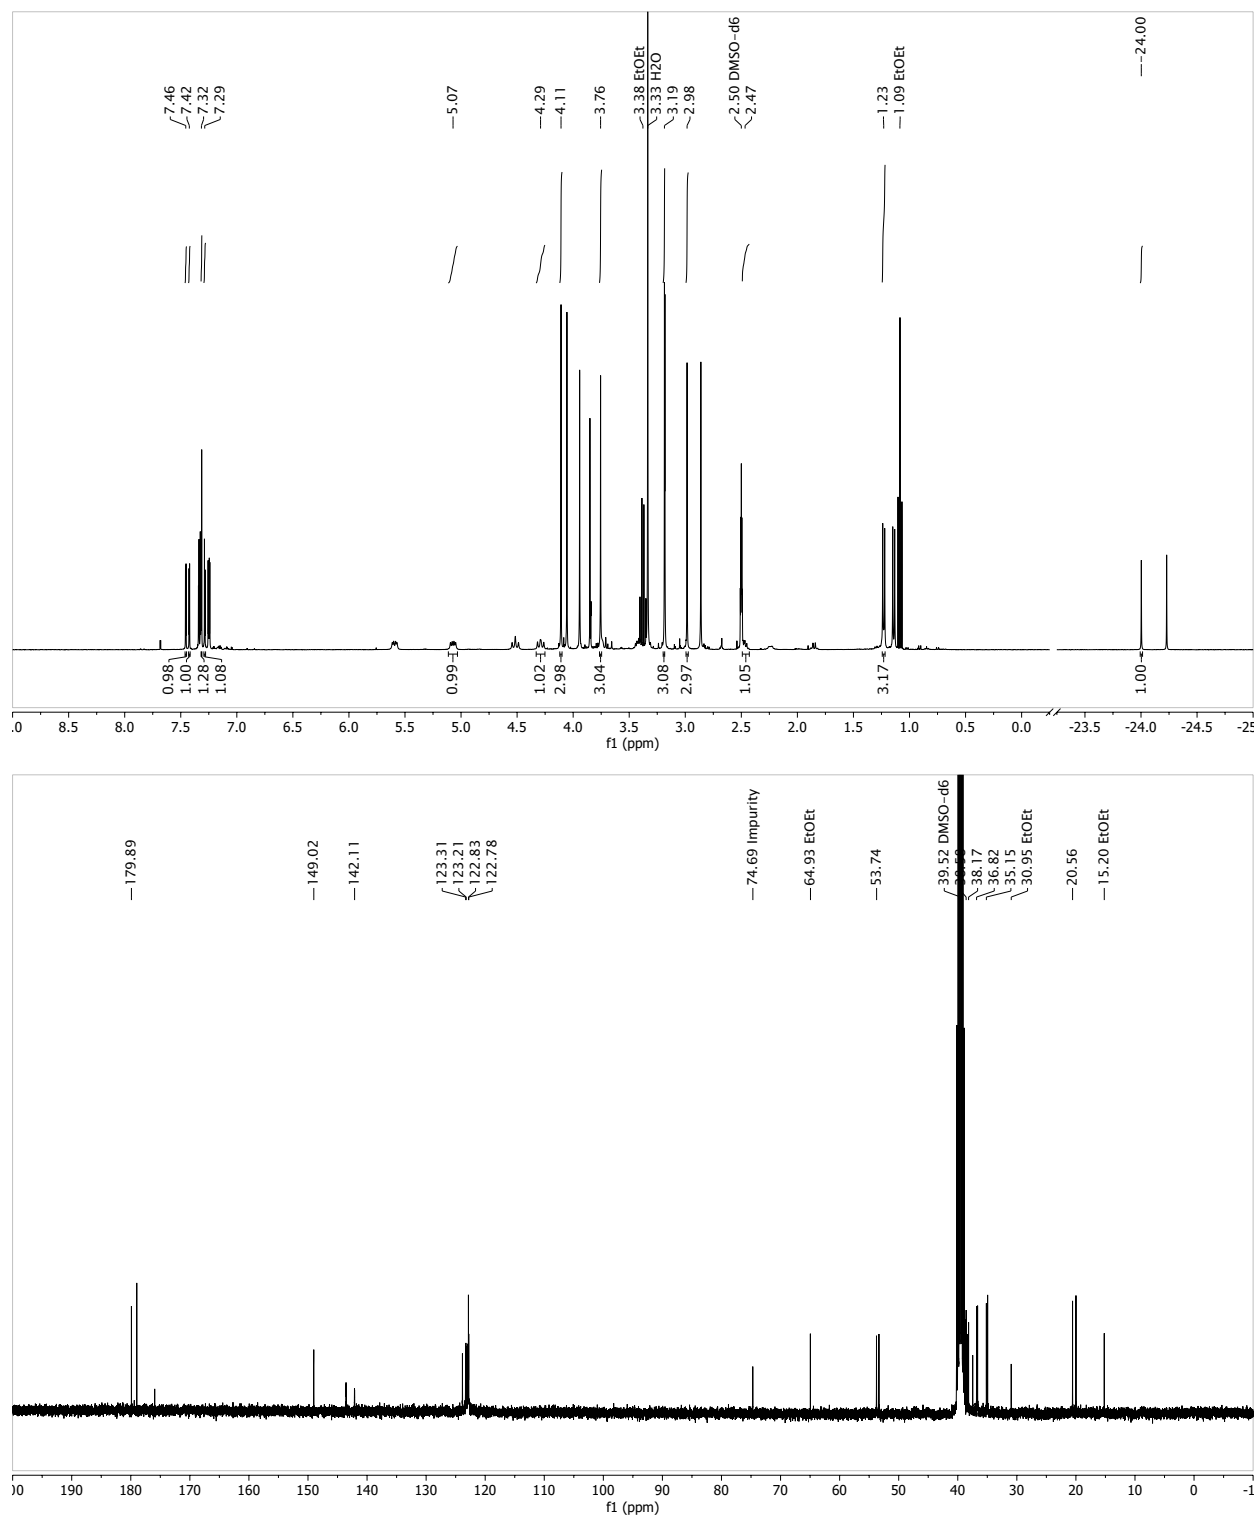

**Figure S3.**  $^1\text{H}$  (top, 400 MHz) and  $^{13}\text{C}$  (bottom, 101 MHz) NMR spectra of the major isomer of  $\text{Ir}(\text{IME})_2(\text{L-Ala})(\text{H})(\text{I})$  in  $\text{DMSO-}d_6$ .

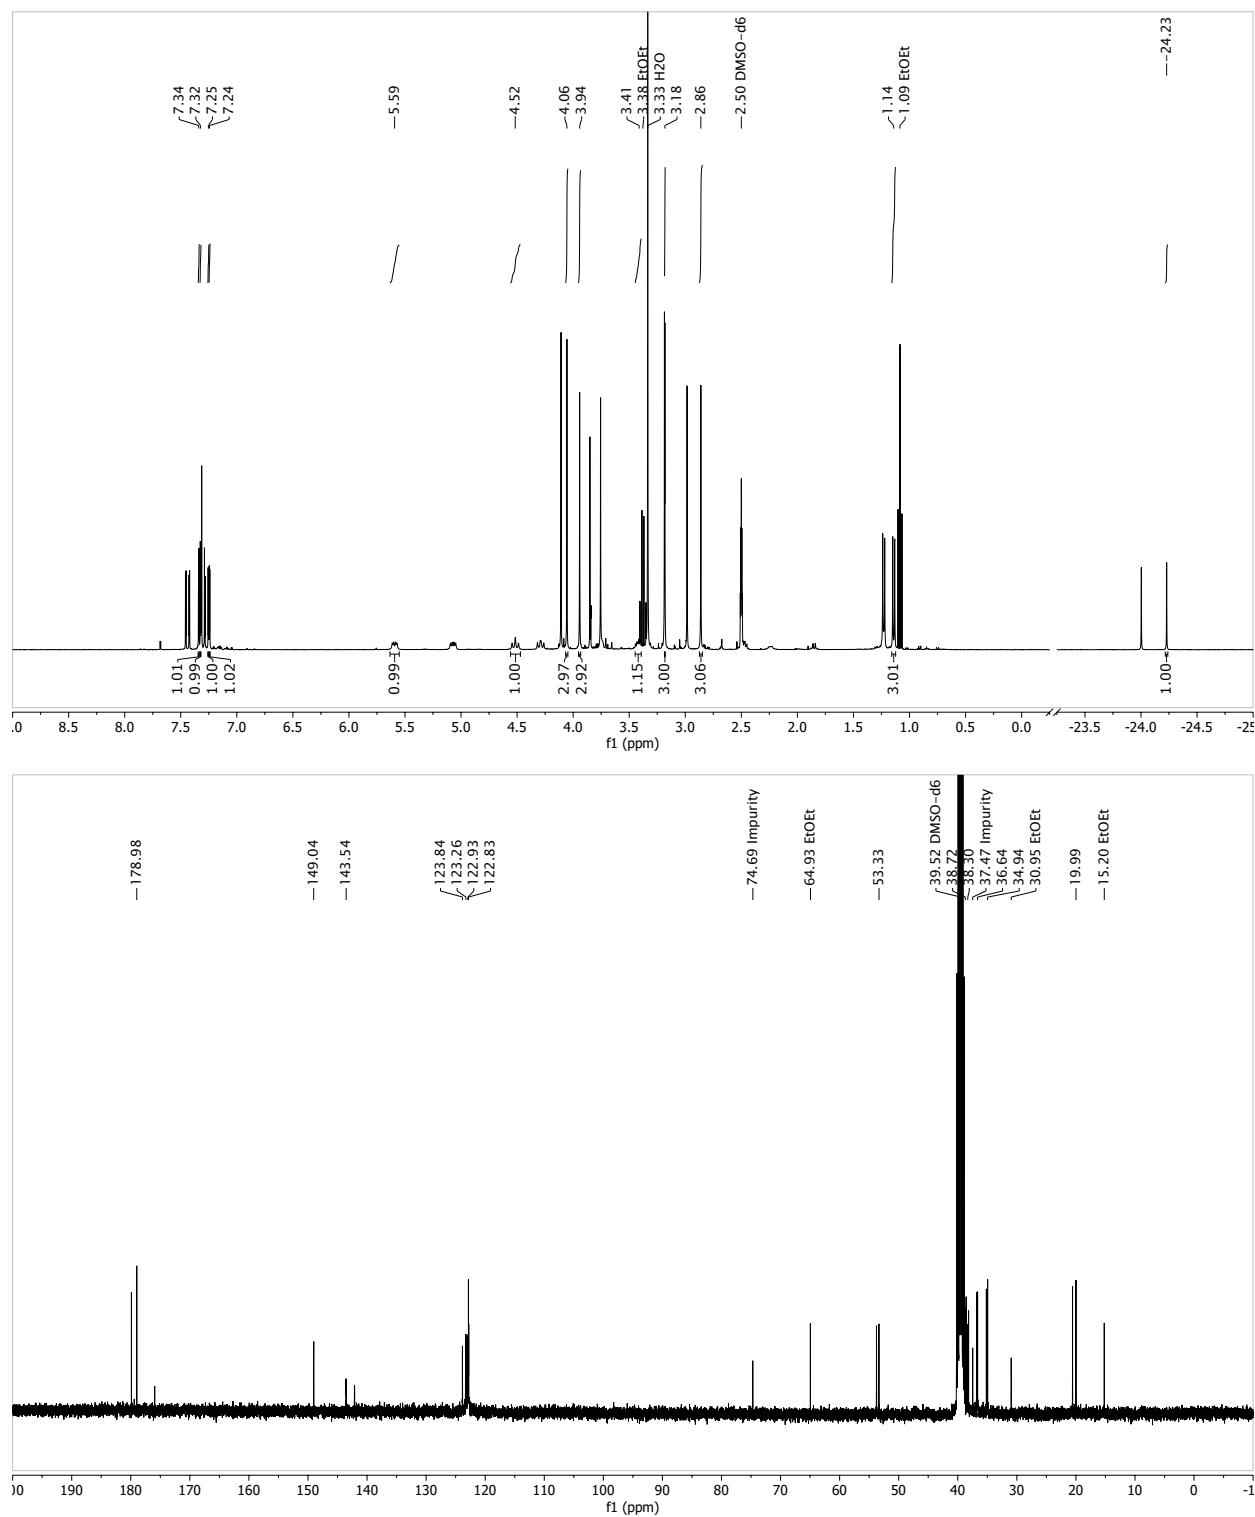

**Figure S4.**  $^1\text{H}$  (top, 400 MHz) and  $^{13}\text{C}$  (bottom, 101 MHz) NMR spectra of the minor isomer of  $\text{Ir(IMe)}_2(\text{L-Ala})(\text{H})(\text{I})$  in  $\text{DMSO-}d_6$ .

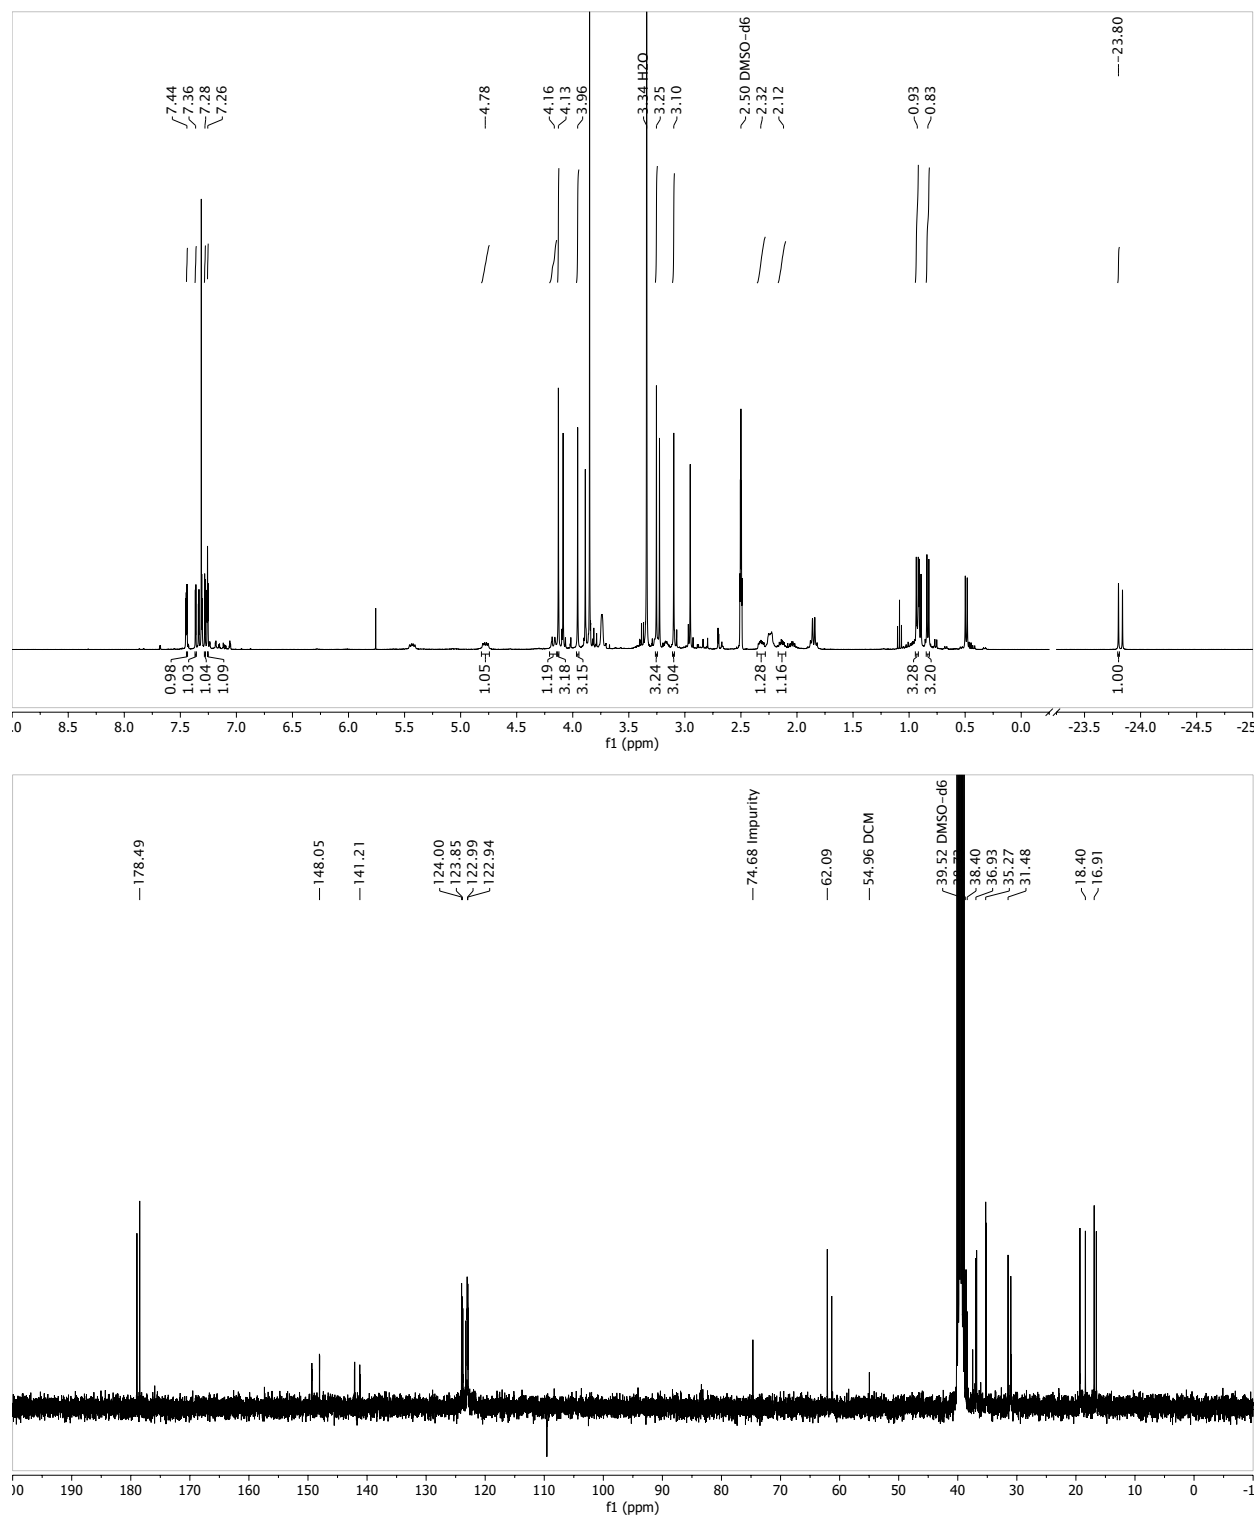

**Figure S5.**  $^1\text{H}$  (top, 400 MHz) and  $^{13}\text{C}$  (bottom, 101 MHz) NMR spectra of the major isomer of  $\text{Ir}(\text{IME})_2(\text{L-Val})(\text{H})(\text{I})$  in  $\text{DMSO-}d_6$ .

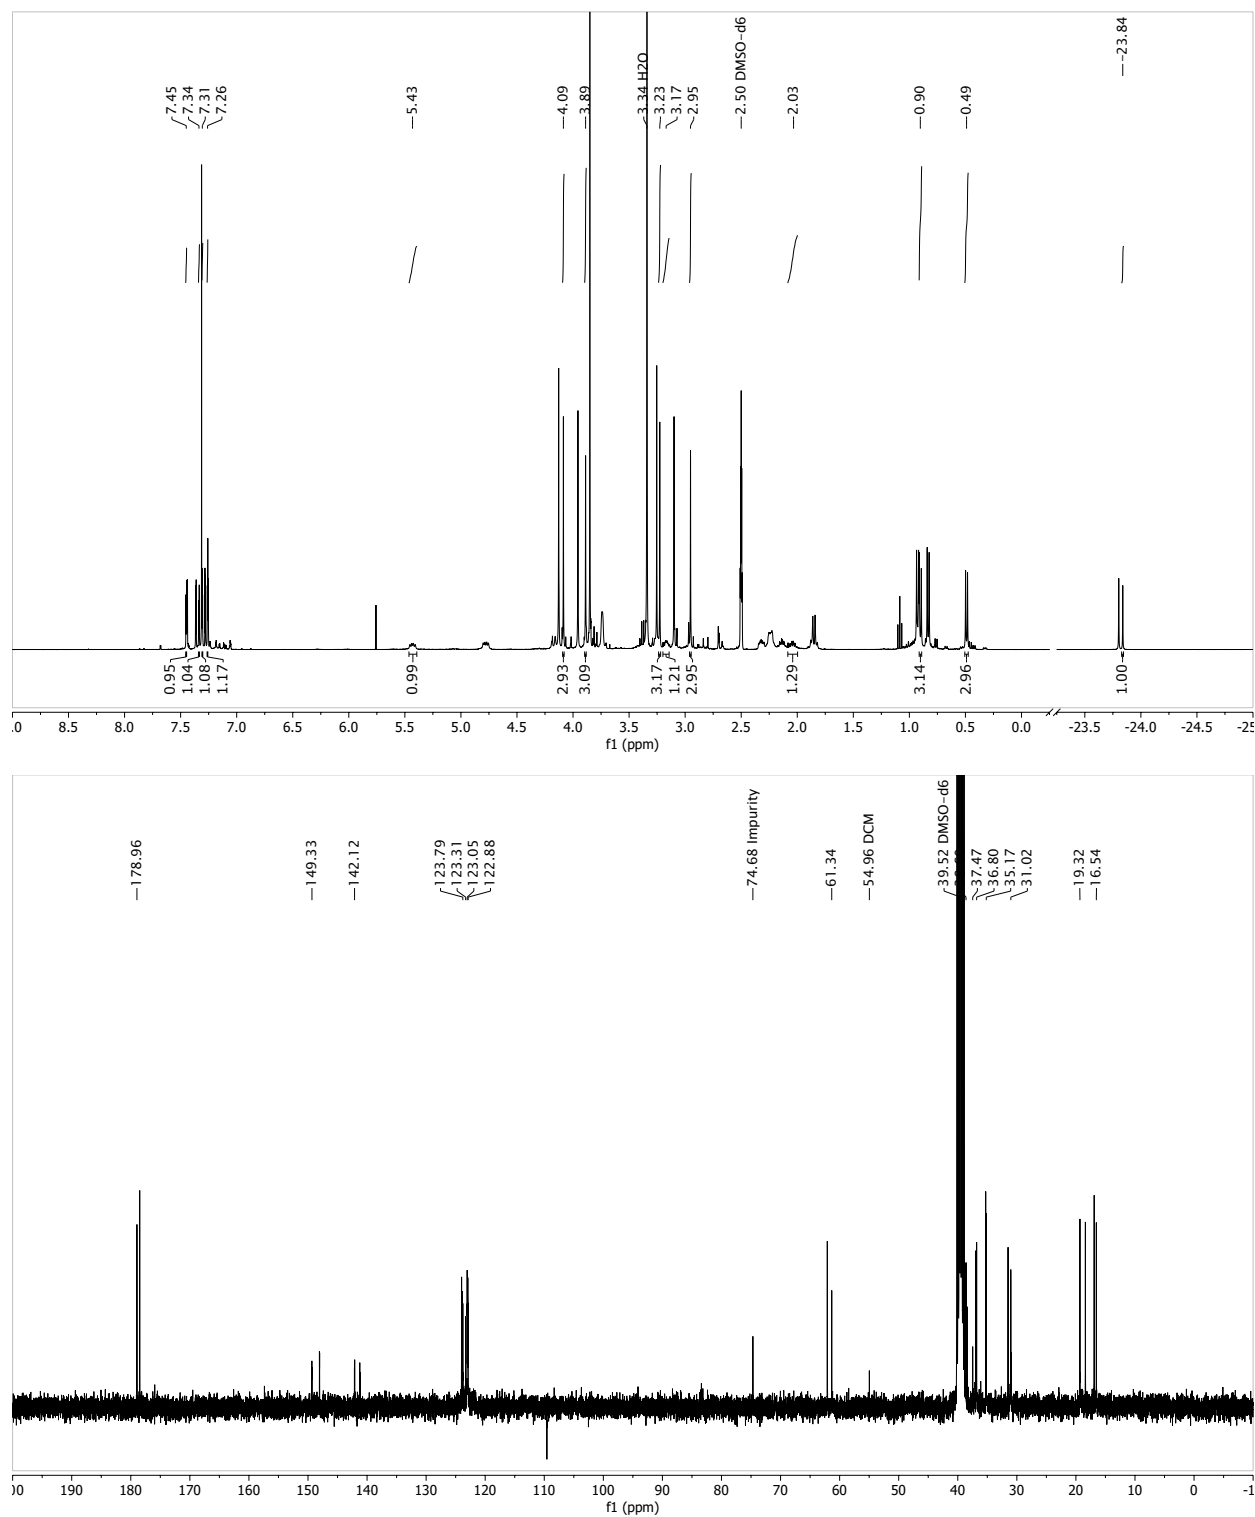

**Figure S6.**  $^1\text{H}$  (top, 400 MHz) and  $^{13}\text{C}$  (bottom, 101 MHz) NMR spectra of the minor isomer of  $\text{Ir}(\text{Ime})_2(\text{L-Val})(\text{H})(\text{I})$  in  $\text{DMSO}-d_6$ .

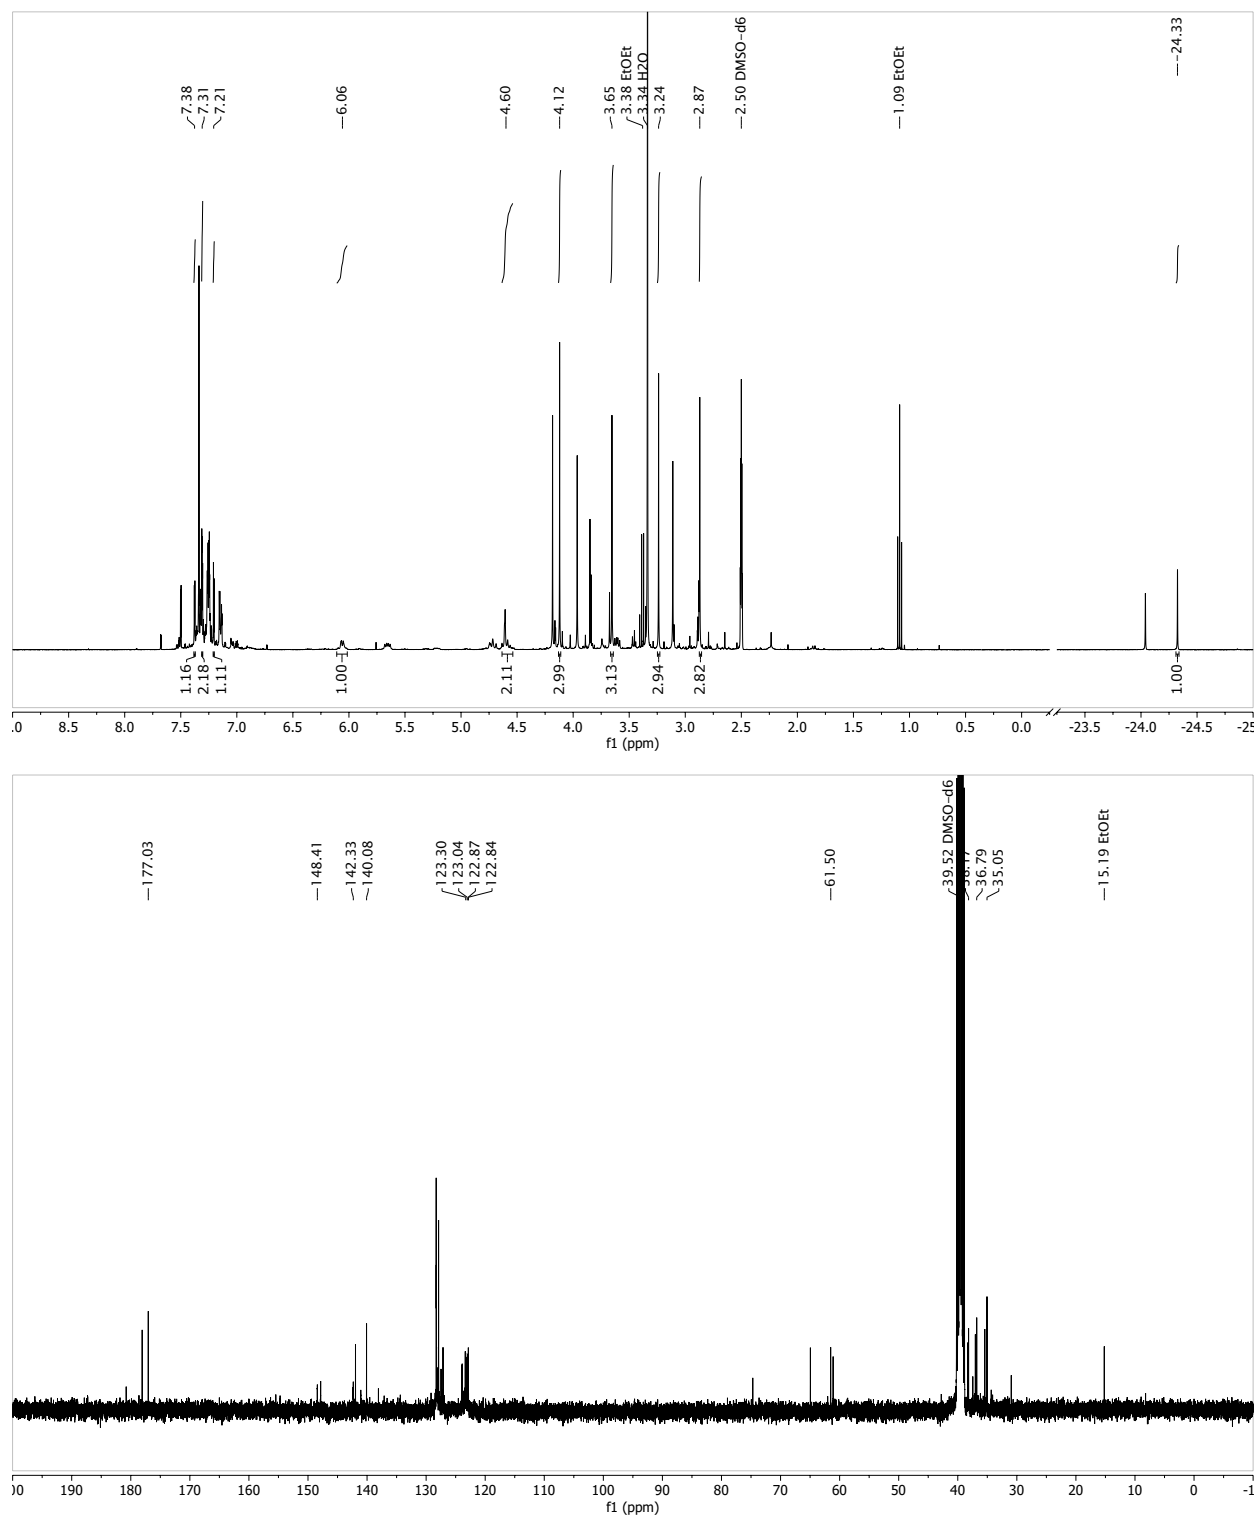

**Figure S7.**  $^1\text{H}$  (top, 400 MHz) and  $^{13}\text{C}$  (bottom, 101 MHz) NMR spectra of the major isomer of  $\text{Ir}(\text{Ime})_2(\text{L-Phg})(\text{H})(\text{I})$  in  $\text{DMSO-}d_6$ .

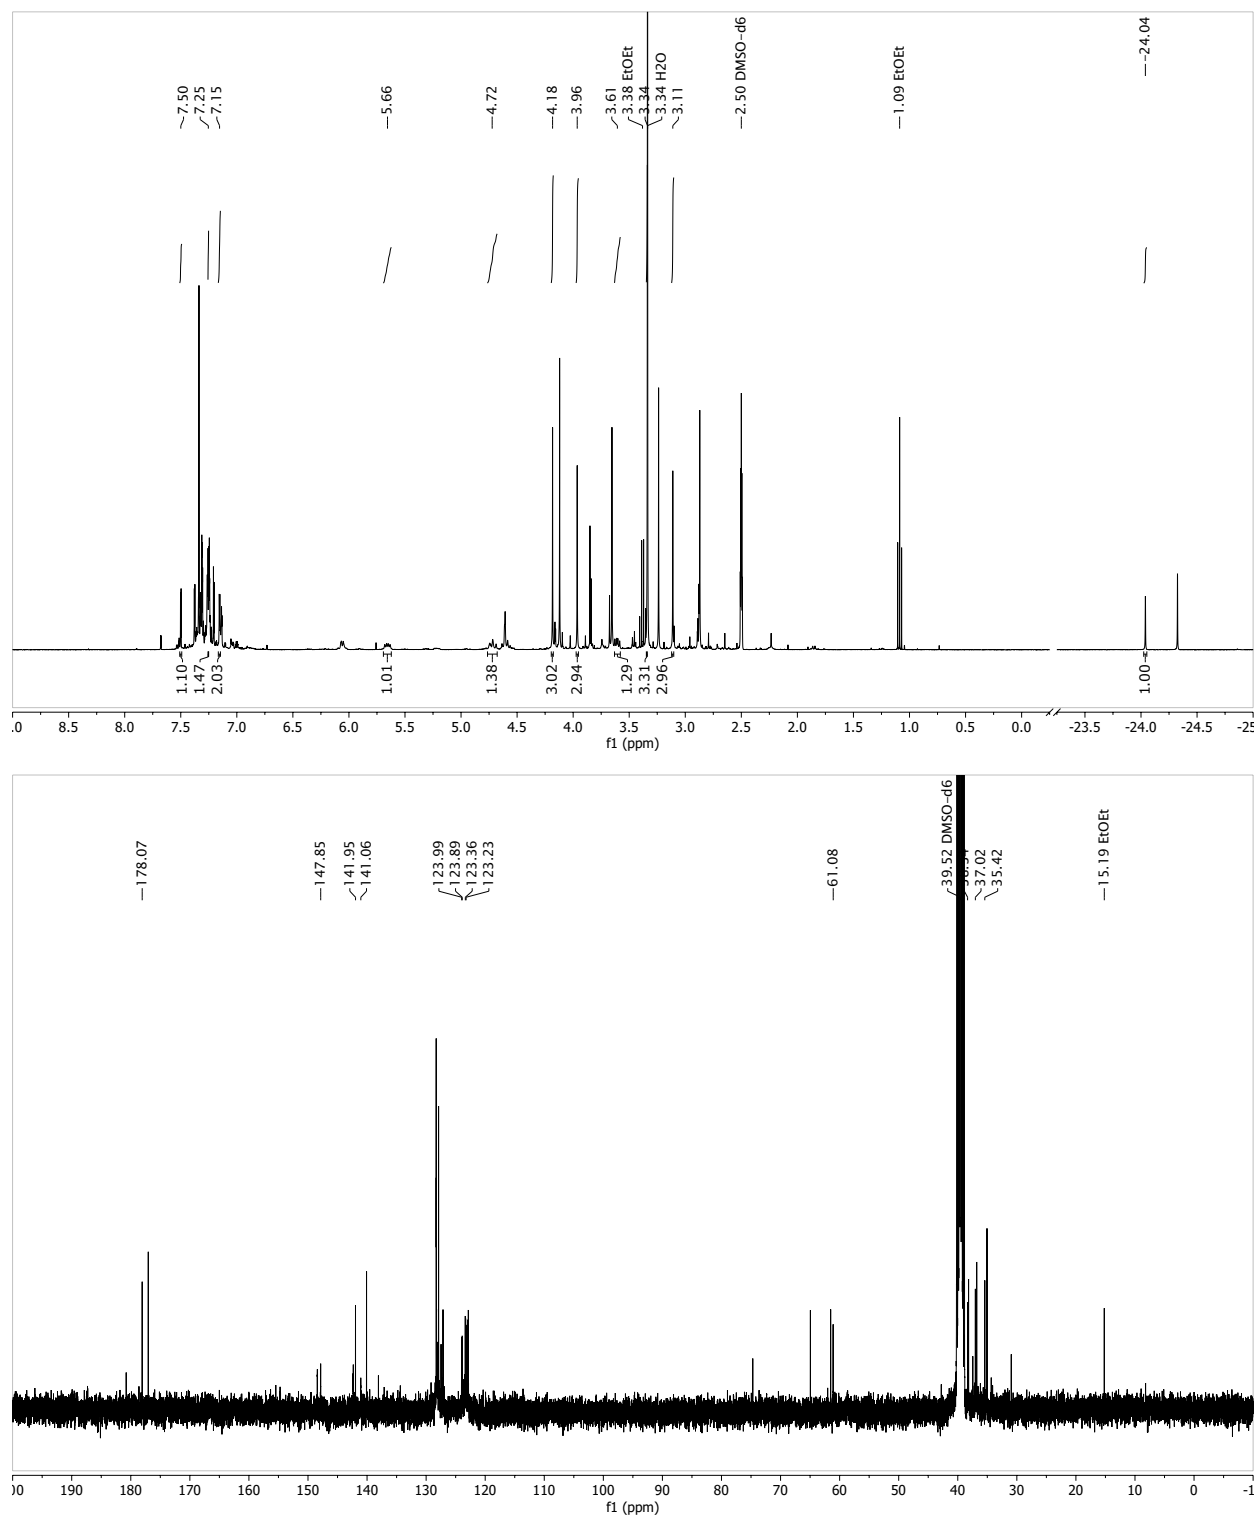

**Figure S8.**  $^1\text{H}$  (top, 400 MHz) and  $^{13}\text{C}$  (bottom, 101 MHz) NMR spectra of the minor isomer of  $\text{Ir}(\text{Ime})_2(\text{L-Phg})(\text{H})(\text{I})$  in  $\text{DMSO-}d_6$ .



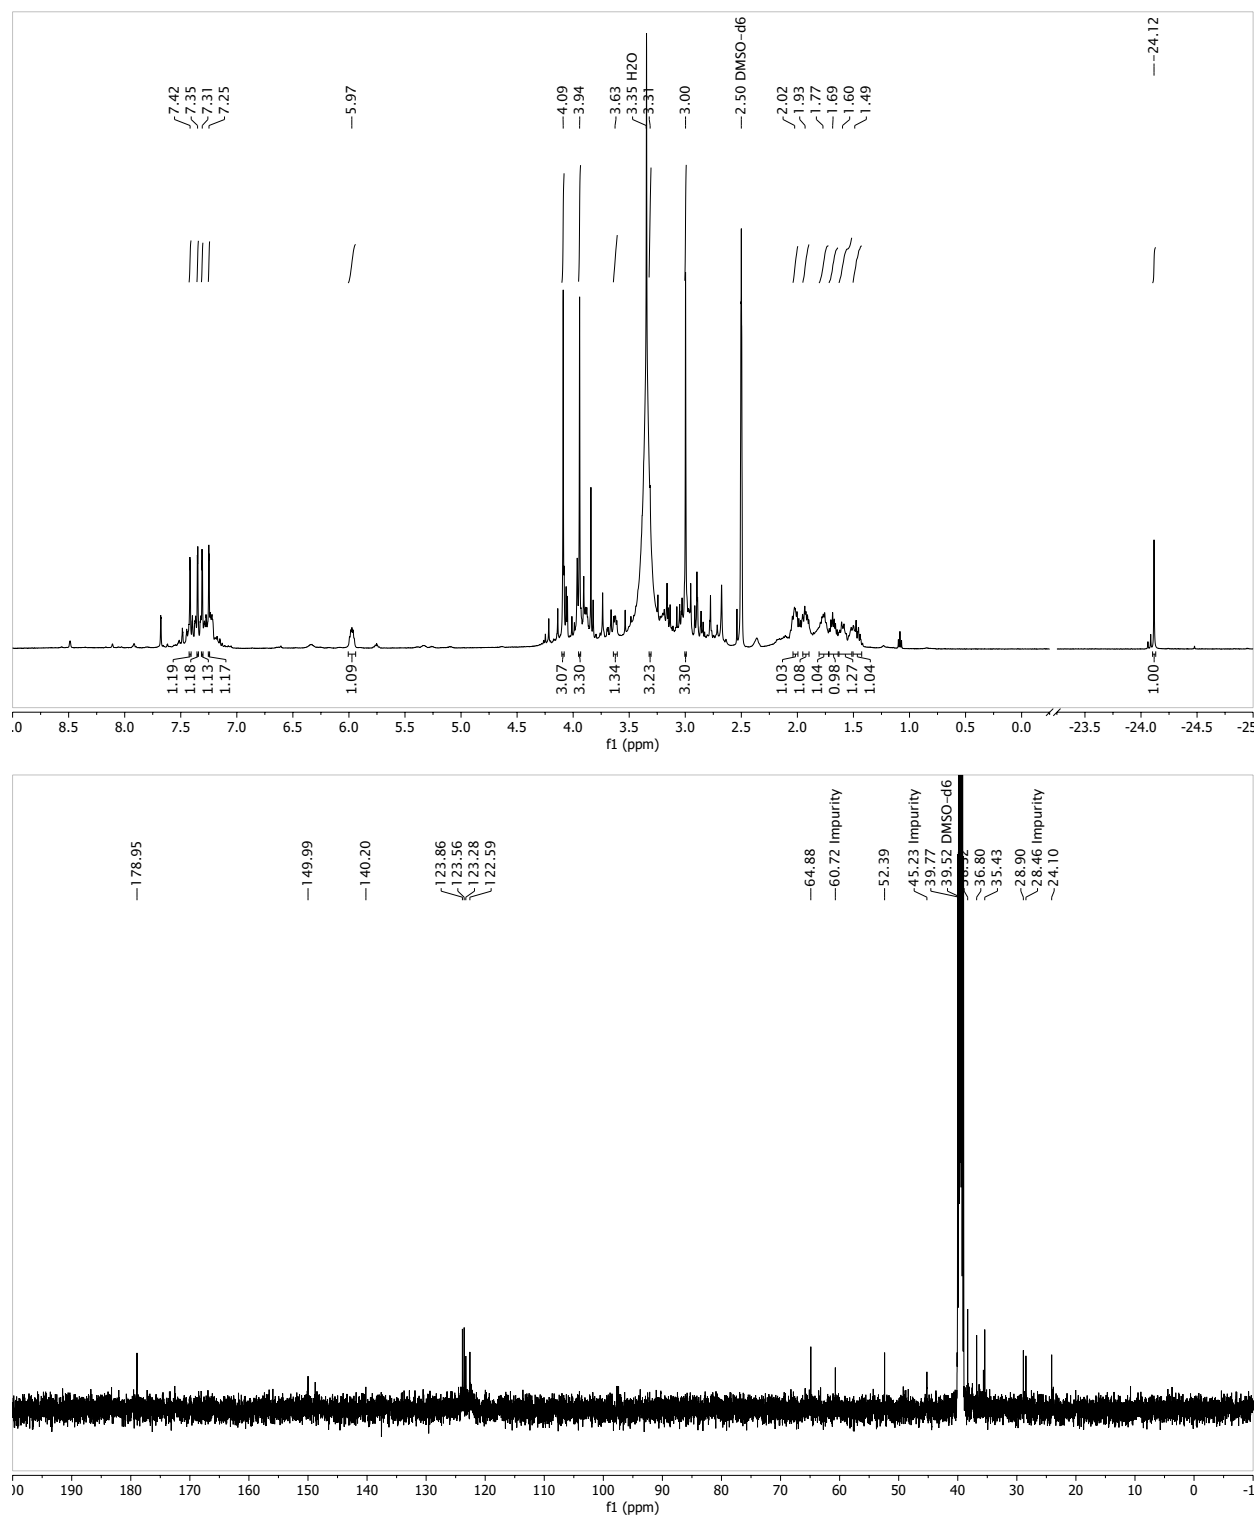

**Figure S9.**  $^1\text{H}$  (top, 400 MHz) and  $^{13}\text{C}$  (bottom, 101 MHz) NMR spectra of  $\text{Ir}(\text{Ime})_2(\text{L-Pro})(\text{H})(\text{I})$  in  $\text{DMSO-d}_6$ .

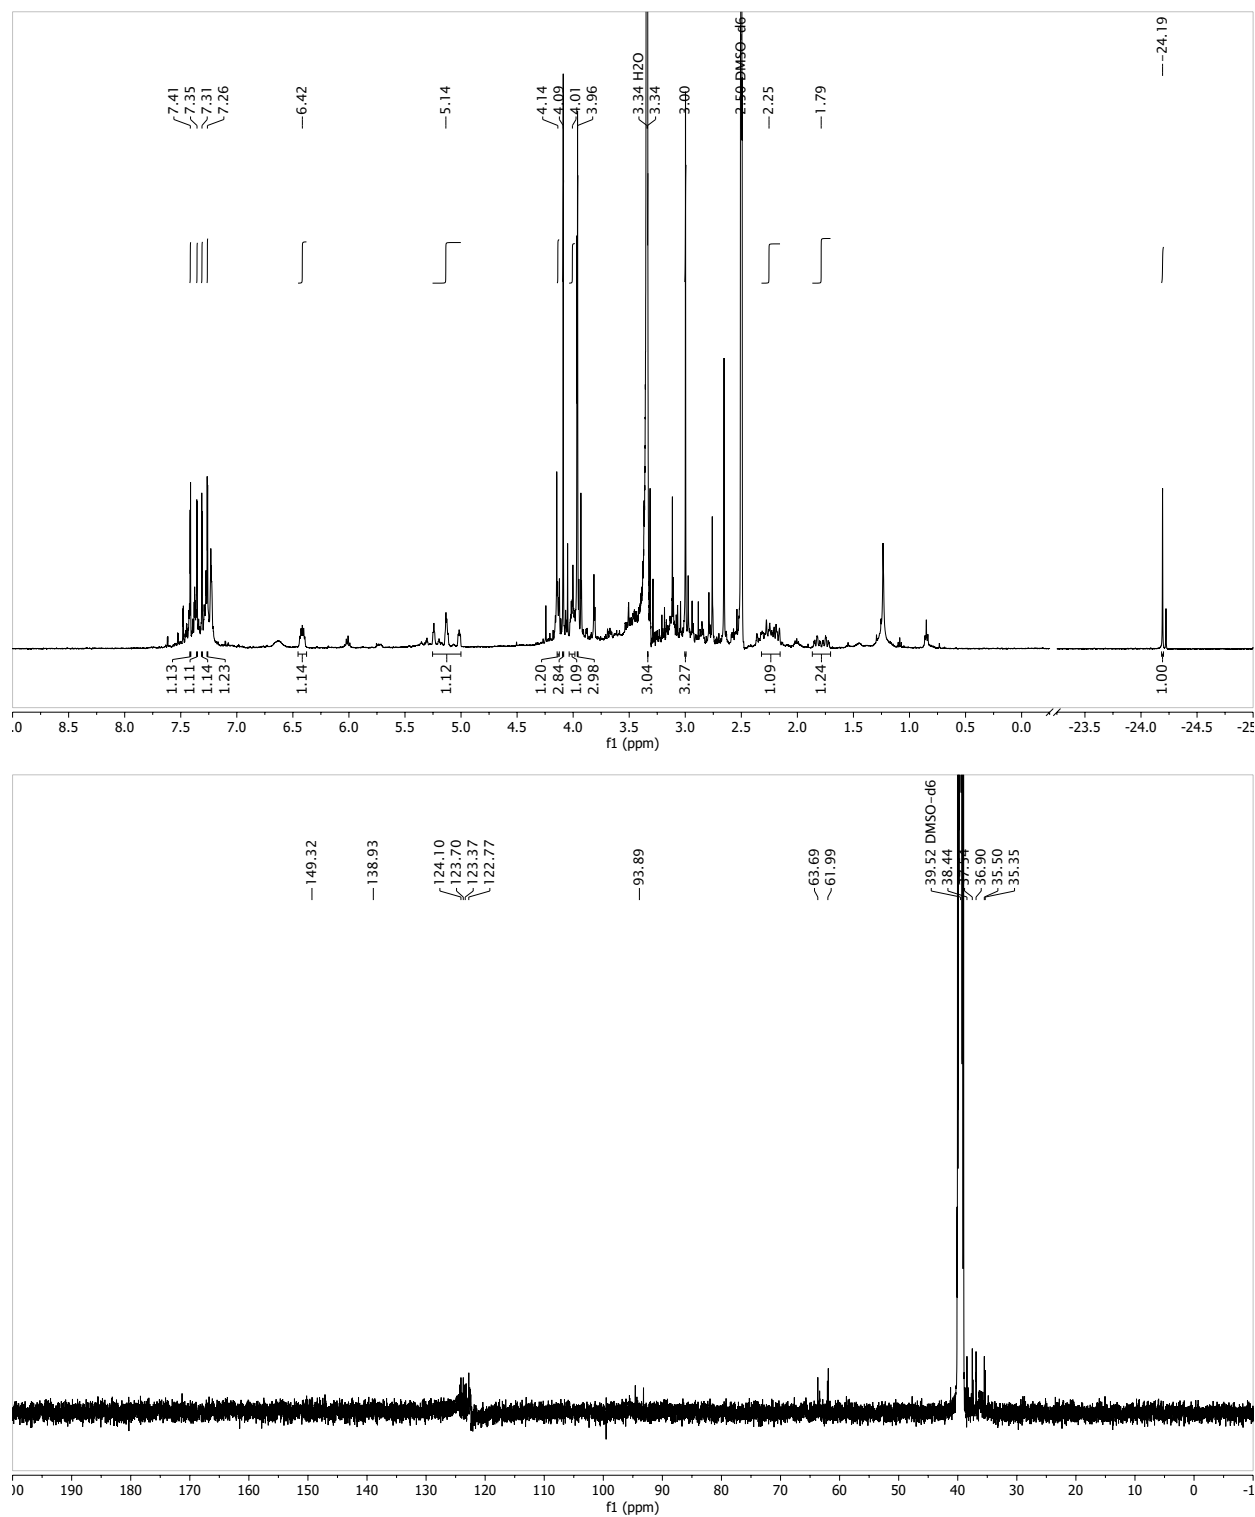

**Figure S10.**  $^1\text{H}$  (top, 400 MHz) and  $^{13}\text{C}$  (bottom, 101 MHz) NMR spectra of  $\text{Ir}(\text{IME})_2(\text{L-F-Pro})(\text{H})(\text{I})$  in  $\text{DMSO-}d_6$ .

### 3. GC Chromatograms of Alcohol Products from ATH Studies

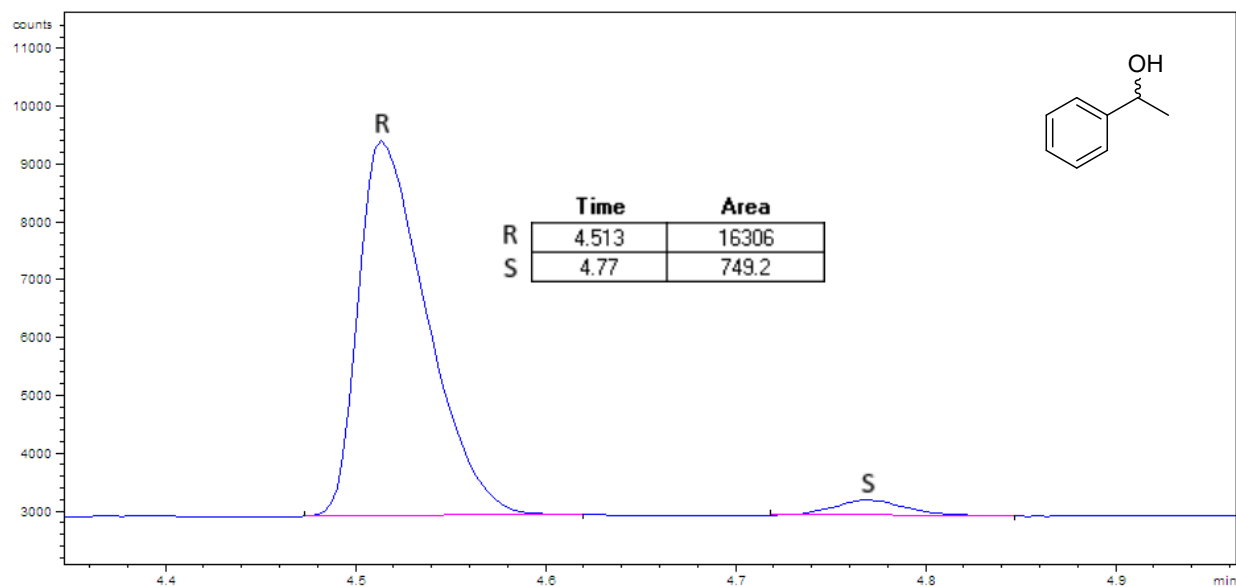

**Figure S11.** FID trace of 1-phenylethanol (column temp = 130 °C).

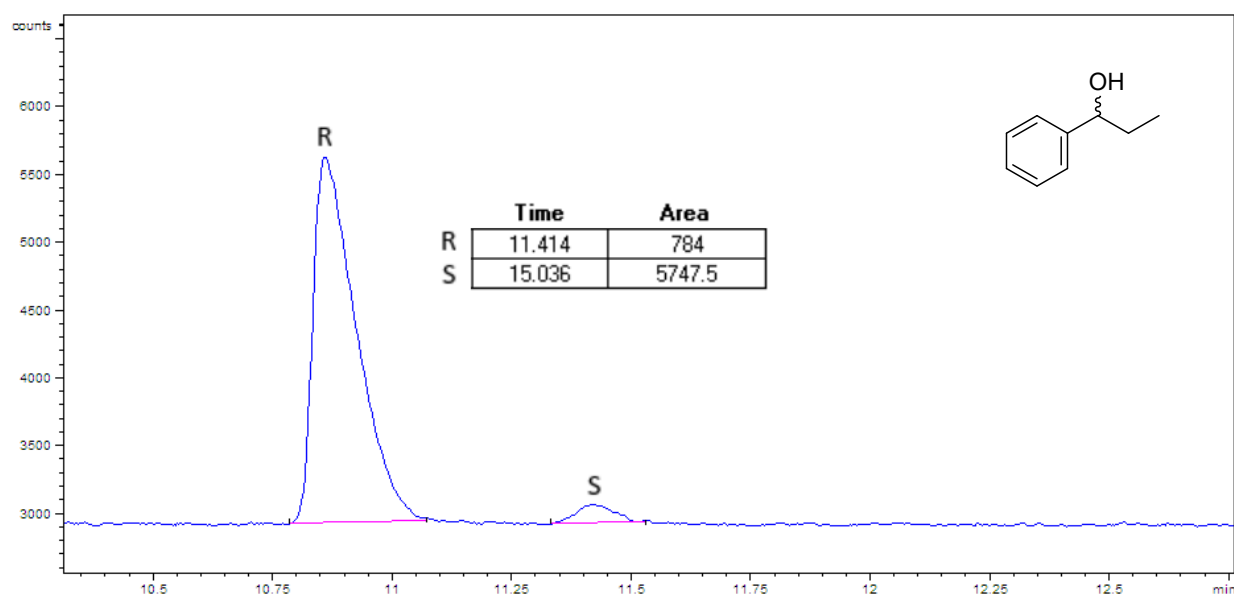

**Figure S12.** FID trace of 1-phenylpropanol (column temp = 120 °C).

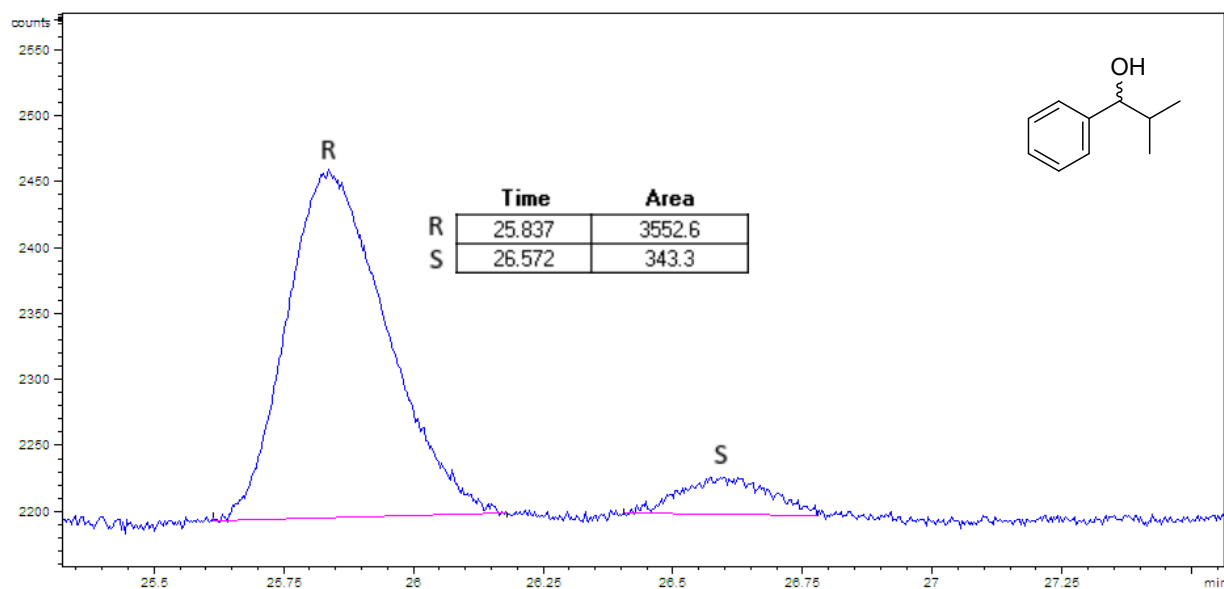

Figure S13. FID trace of 2-methyl-1-phenylpropanol (column temp = 110 °C).

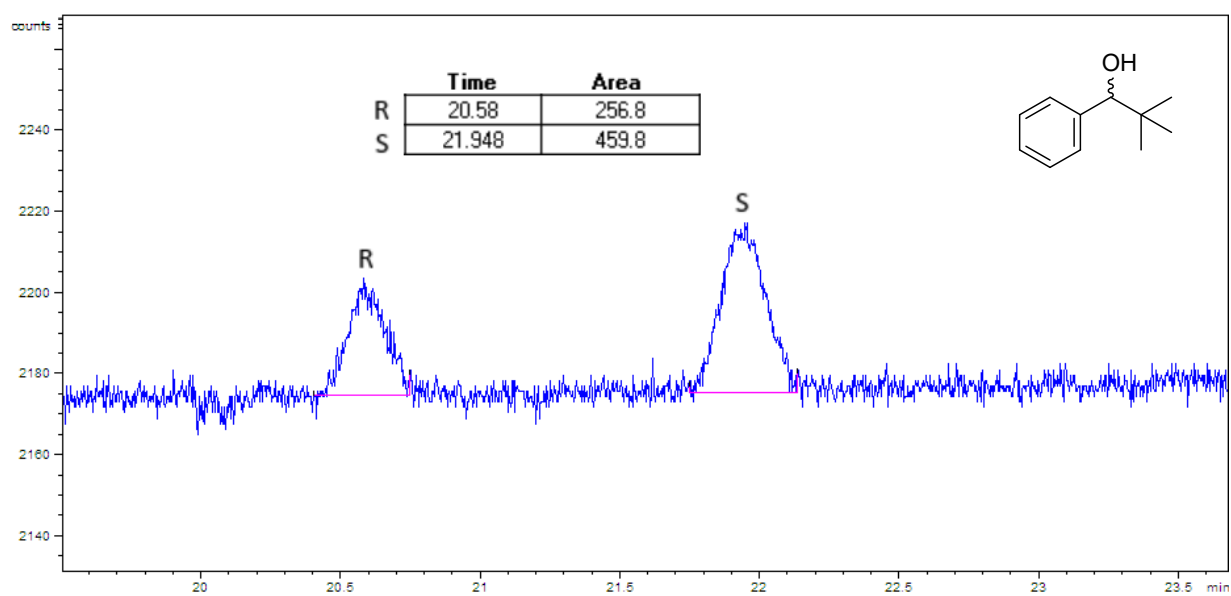

Figure S14. FID trace of 2,2-dimethyl-1-phenylpropanol (column temp = 120 °C).

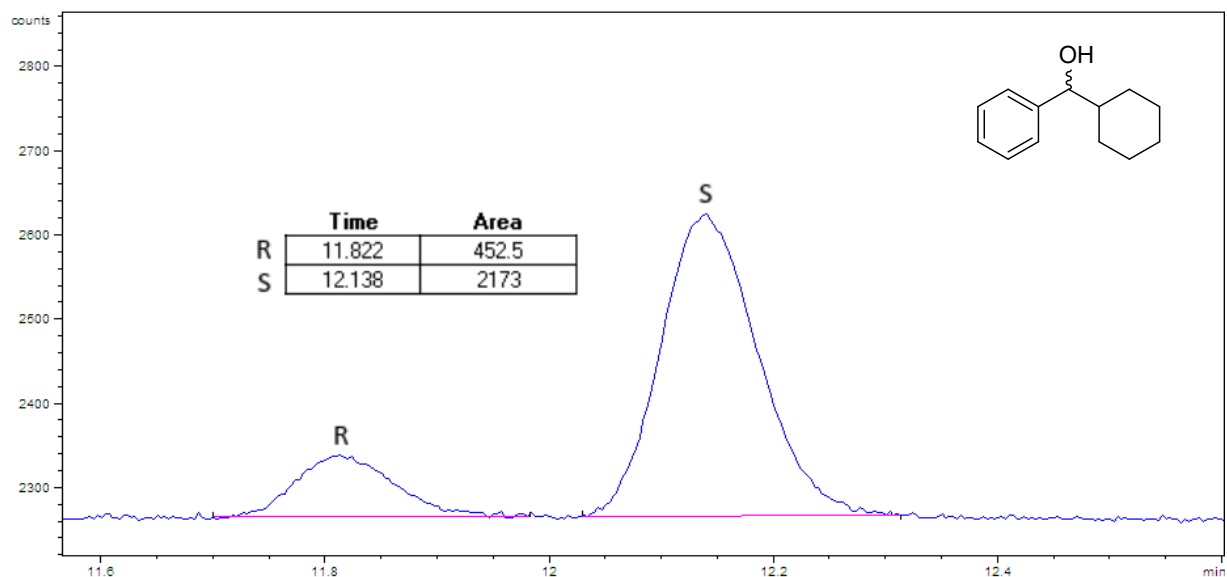

**Figure S15.** FID trace of cyclohexyl(phenyl)methanol (column temp = 160 °C).

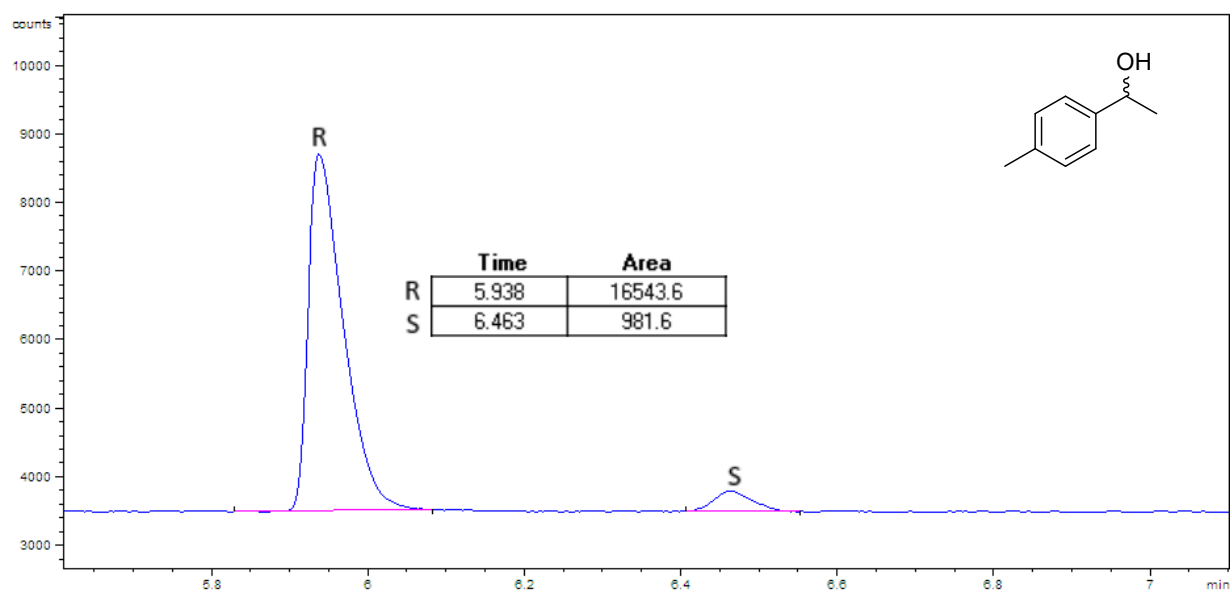

**Figure S16.** FID trace of 1-(p-tolyl)ethanol (column temp = 130 °C).

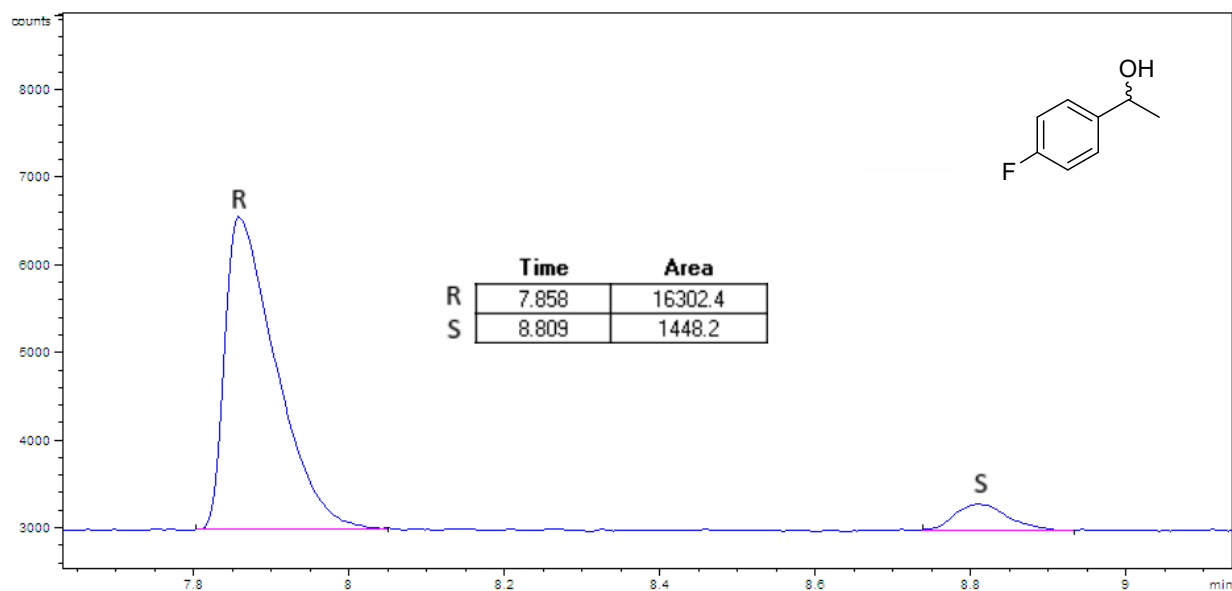

**Figure S17.** FID trace of 1-(4-fluorophenyl)ethanol (column temp = 120 °C).

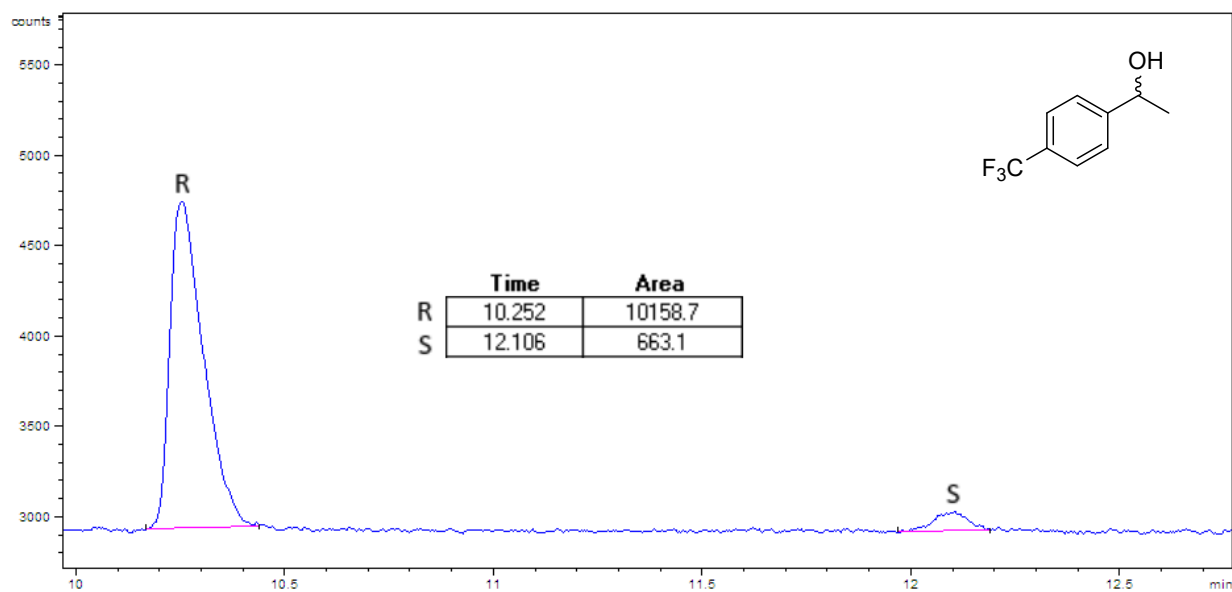

**Figure S18.** FID trace of 1-(4-(trifluoromethyl)phenyl)ethanol (column temp = 120 °C).

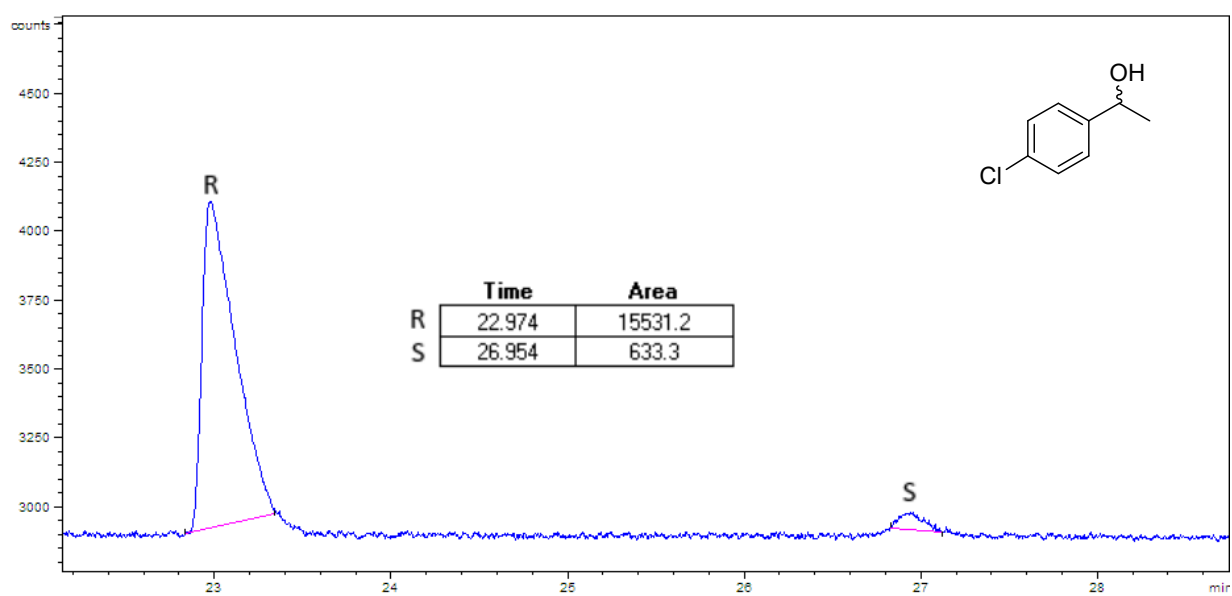

**Figure S19.** FID trace of 1-(4-chlorophenyl)ethanol (column temp = 120 °C).
